# Supplementary material for: α-Ketoglutarate inhibits autophagy
Source: Aging (Albany NY). 2019 Jun 7;11(11):3418–31. doi: 10.18632/aging.102001 (PMC6594794; doi:10.18632/aging.102001)
Supplement: Supplementary Table [file aging-11-102001-s001.xls]

## Sheet: Metabolites 
	CM-DMKG.hi.FC	CM-DMKG.hi.SE	CM-TFMKG.hi.FC	CM-TFMKG.hi.SE	CM-O-KG.hi.FC	CM-O-KG.hi.SE	NF-DMKG.hi.FC	NF-DMKG.hi.SE	NF-TFMKG.hi.FC	NF-TFMKG.hi.SE	NF-OKG.hi.FC	NF-O-KG.hi.SE
2-aminoadipic acid	-0.216	0.169	0.171	0.169	0.145	0.186	NA	NA	NA	NA	NA	NA
2-hydroxyglutaric acid	2.347	0.186	1.096	0.186	0.346	0.205	5.11	0.303	1.784	0.303	1.445	0.303
2-oxoglutaric acid	5.287	0.244	6.406	0.244	6.504	0.269	7.916	0.322	6.637	0.322	5.406	0.322
2-Phenylglycine	0.063	0.082	-0.052	0.082	-0.354	0.09	NA	NA	NA	NA	NA	NA
3-hydroxybutyric acid	0.247	0.278	0.368	0.278	-0.184	0.306	-0.063	0.146	-0.273	0.146	-0.288	0.146
3-methylhistidine	-0.063	0.12	-0.098	0.12	-0.397	0.133	NA	NA	NA	NA	NA	NA
4-hydroxymandelic acid	-0.128	0.184	-0.263	0.184	-1.518	0.203	0.569	0.253	-0.066	0.253	0.122	0.253
4-hydroxyproline	0.075	0.128	-0.306	0.128	-1.015	0.141	0.358	0.23	-0.42	0.23	-0.349	0.23
5-aminovaleric acid	0.341	0.182	-0.213	0.182	-1.764	0.201	1.237	0.267	-0.353	0.267	0.164	0.267
MeSAdenosine	-0.261	0.168	0.091	0.168	-0.947	0.184	0.522	0.125	-0.137	0.125	0.296	0.125
5-oxoproline	0.002	0.124	-0.256	0.124	-0.907	0.137	0.868	0.161	-0.047	0.161	0.148	0.161
Acetylcarnitine	-0.262	0.128	-0.411	0.128	-1.749	0.14	0.497	0.111	-0.765	0.111	0.303	0.111
Acetylcholine	-0.183	0.128	-0.096	0.128	-1.392	0.141	0.377	0.088	-0.112	0.088	0.08	0.088
AcetylCoA	0.283	0.197	-0.04	0.197	0.229	0.217	0.57	0.12	0.425	0.12	0.147	0.12
Adenine	-0.187	0.125	0.05	0.125	-0.398	0.137	0.496	0.126	0.121	0.126	0.265	0.126
Adenosine	-0.95	0.703	-1.158	0.703	-1.752	0.774	NA	NA	NA	NA	NA	NA
Adenosine/2-deoxyguanosine	-0.987	0.462	-0.642	0.462	-0.97	0.509	-0.124	0.251	1.012	0.251	1.27	0.251
ADP	-1.097	0.735	-1.071	0.735	-3.176	0.809	-0.394	0.31	0.231	0.31	0.057	0.31
Alanine	-0.011	0.141	-0.063	0.141	-0.819	0.155	-0.033	0.247	0.708	0.247	0.347	0.247
Allantoin	0.158	0.146	0.043	0.146	-0.455	0.16	NA	NA	NA	NA	NA	NA
AMP	-2.043	0.715	-1.081	0.715	-2.543	0.787	-0.857	0.318	0.668	0.318	0.429	0.318
Arabinose	-0.532	0.202	-0.075	0.202	-0.718	0.222	0.302	0.178	-0.089	0.178	0.047	0.178
Arabitol	0.017	0.157	0.063	0.157	-0.334	0.173	NA	NA	NA	NA	NA	NA
Arachidonic acid	-0.456	0.215	-0.128	0.215	-1.359	0.237	0.023	0.208	-0.121	0.208	-0.207	0.208
Arginine	0.006	0.08	-0.006	0.08	0.317	0.088	0.066	0.316	0.015	0.316	0.343	0.316
Asparagine	-0.5	0.216	-0.071	0.216	-1.777	0.238	0.56	0.27	0.492	0.27	0.271	0.27
Aspartic acid	-1.122	0.246	0.013	0.246	-2.292	0.271	-1.706	0.316	-0.538	0.316	-0.559	0.316
ATP	0.219	0.324	-0.297	0.324	-1.164	0.356	0.123	0.109	-0.306	0.109	-0.359	0.109
Benzoic acid	-0.218	0.104	-0.08	0.104	-0.266	0.115	0.106	0.148	-0.177	0.148	0.089	0.148
Beta-alanine	-0.487	0.222	-0.461	0.222	-2.308	0.244	0.432	0.367	0.452	0.367	0.411	0.367
Caproic acid	-0.281	0.141	-0.317	0.141	-0.512	0.155	-0.432	0.126	-0.984	0.126	-0.262	0.126
Caprylic acid	-0.319	0.134	-0.165	0.134	-0.344	0.148	0.804	0.319	-0.421	0.319	0.023	0.319
Carnitine	-0.239	0.132	-0.357	0.132	-1.261	0.145	0.286	0.152	0.012	0.152	-0.272	0.152
AcCarn C4:0	-0.358	0.154	0.663	0.154	-1.493	0.169	-1.474	0.168	0.791	0.168	-0.337	0.168
AcCarn C5:0	-0.164	0.309	-2.076	0.309	-3.378	0.34	0.279	0.38	1.296	0.38	0.829	0.38
Cholesterol	-0.235	0.133	-0.125	0.133	-1.365	0.146	0.35	0.162	0.21	0.162	0.164	0.162
Choline phosphate	-0.105	0.139	-0.346	0.139	-1.627	0.153	-0.211	0.118	-0.54	0.118	-0.488	0.118
(Iso)citric acid	1.075	0.178	-1.005	0.178	-1.539	0.196	2.005	0.829	-2.676	0.829	-2.404	0.829
Citrulline	0.19	0.137	0.256	0.137	-0.1	0.151	NA	NA	NA	NA	NA	NA
CMP	-1.586	0.502	-0.624	0.502	-1.872	0.553	-0.789	0.222	1.31	0.222	0.604	0.222
CMP-NeuNAc	-0.915	0.159	0.089	0.159	-1.335	0.175	-1.099	0.25	0.513	0.25	-0.061	0.25
CoA	-0.278	0.3	-0.545	0.3	-1.676	0.33	-0.328	0.143	-1.728	0.143	-0.287	0.143
Coumaric acid	-0.412	0.403	0.242	0.403	0.117	0.444	-0.725	0.43	-0.521	0.43	-0.634	0.43
Creatine	-0.538	0.231	-0.378	0.231	-2.512	0.255	0.4	0.395	0.294	0.395	0.279	0.395
Creatinine	0.013	0.109	0.007	0.109	0.144	0.12	0.045	0.132	0.004	0.132	0.218	0.132
Cysteinylglycine	-0.421	0.233	-0.673	0.233	-2.282	0.256	0.116	0.103	-0.446	0.103	-0.33	0.103
Cystine/Cysteine	-0.55	0.181	-0.134	0.181	-2.257	0.2	0.037	0.247	-0.175	0.247	-0.356	0.247
Cytidine	0.008	0.124	-0.198	0.124	-0.917	0.136	-0.365	0.131	-0.3	0.131	-0.435	0.131
Cytosine	-0.719	0.236	-0.584	0.236	-0.353	0.259	-1.508	0.211	0.471	0.211	0.148	0.211
Deoxycholic acid	-0.251	0.136	-0.141	0.136	-1.345	0.15	0.355	0.163	0.275	0.163	0.144	0.163
Docosapentaenoic acid	-0.246	0.256	-0.157	0.256	-1.437	0.282	-0.002	0.362	-1.297	0.362	-0.022	0.362
Erythritol	-0.101	1.041	-0.073	1.041	-0.628	1.146	0.025	0.41	0.045	0.41	-0.229	0.41
Fructose	-0.086	1.129	-0.166	1.129	-0.714	1.243	1.131	0.296	-0.193	0.296	-0.056	0.296
Fumaric acid	1.12	0.153	0.149	0.153	-1.665	0.168	2.682	0.378	0.291	0.378	0.304	0.378
GABA	-0.441	0.213	-0.254	0.213	-1.551	0.235	0.726	0.479	0.492	0.479	0.602	0.479
C6-polyol	-0.252	0.119	-0.399	0.119	-1.161	0.131	-0.259	0.236	-0.369	0.236	0.317	0.236
Glu/Gal/Man	-0.03	0.358	-0.016	0.358	-0.454	0.394	0.389	0.184	-0.161	0.184	-0.081	0.184
Glutamylleucine	-0.087	0.12	-0.08	0.12	-1.09	0.132	0.412	0.133	0.457	0.133	0.523	0.133
Glutamylphenylalanine	-0.078	0.182	-0.183	0.182	-1.429	0.201	0.455	0.224	0.907	0.224	0.746	0.224
Glutamyltyrosine	-0.031	0.155	-0.159	0.155	-1.226	0.171	0.174	0.226	0.287	0.226	0.407	0.226
G6P/F6P	0.36	0.239	-0.152	0.239	-2.021	0.263	1.189	0.213	0.659	0.213	0.047	0.213
Glutamic acid	0.277	1.2	-0.197	1.2	-2.216	1.321	1.167	0.228	-0.613	0.228	-0.02	0.228
Glutamine	0.226	0.135	-0.177	0.135	-0.769	0.149	1.199	0.387	0.844	0.387	0.495	0.387
Glutarylcarnitine	-0.067	0.183	-0.039	0.183	-0.381	0.202	NA	NA	NA	NA	NA	NA
Glutathione	-0.34	0.198	-0.516	0.198	-1.918	0.218	0.149	0.087	-0.269	0.087	-0.23	0.087
Glyceraldehyde 3P	-0.536	0.182	-0.127	0.182	-0.771	0.2	-0.588	0.097	0.112	0.097	0.052	0.097
Glyceric acid	-0.179	0.18	-0.838	0.18	-1.695	0.198	0.323	0.191	-0.152	0.191	-0.368	0.191
Glycerol	0.211	1.062	0.009	1.062	-1.517	1.169	-0.162	0.164	-0.405	0.164	-0.408	0.164
Glycerol-3P	-0.144	0.162	-0.285	0.162	-1.584	0.179	0.449	0.198	-0.404	0.198	-0.073	0.198
GPCho	0.173	0.13	-0.194	0.13	-0.678	0.143	0.399	0.112	-0.503	0.112	-0.123	0.112
Glycine	0.214	0.19	-0.279	0.19	-0.52	0.209	1.069	0.655	3.226	0.655	1.076	0.655
Glycylglycine	-0.259	0.62	0.473	0.62	1.002	0.683	NA	NA	NA	NA	NA	NA
GMP	-2.554	0.702	-1.113	0.702	-2.243	0.773	-0.761	0.33	1.783	0.33	0.856	0.33
Guanosine	0.172	0.179	0.246	0.179	0.094	0.198	-0.018	0.148	0.074	0.148	0.095	0.148
Heptadecenoic acid	-0.174	0.165	-0.19	0.165	-0.881	0.181	-0.01	0.341	-0.68	0.341	0.247	0.341
Heptanoic acid	-0.197	0.106	-0.173	0.106	-0.287	0.116	-0.358	0.099	-0.731	0.099	-0.25	0.099
Hippuric acid	-0.295	0.158	-0.1	0.158	-0.501	0.174	-0.176	0.39	0.006	0.39	0.134	0.39
Histidine	0.212	0.162	0.044	0.162	-0.596	0.179	0.921	0.406	0.029	0.406	0.089	0.406
Homoserine	0.308	0.13	0.112	0.13	-0.573	0.143	NA	NA	NA	NA	NA	NA
Hypotaurine	-0.653	0.227	-0.412	0.227	-2.424	0.249	0.361	0.245	0.062	0.245	0.126	0.245
Hypoxanthine	0.571	0.382	1.115	0.382	1.303	0.421	NA	NA	NA	NA	NA	NA
Inosine	-1.234	0.886	-0.714	0.886	-0.015	0.975	-0.278	0.487	1.83	0.487	1.217	0.487
Inositol	-0.323	0.214	-0.256	0.214	-0.847	0.236	1.032	0.262	0.824	0.262	0.918	0.262
Isoleucine	0.259	0.19	-0.016	0.19	-0.557	0.21	-0.139	0.417	0.198	0.417	0.092	0.417
Ketovaline	1.866	0.146	-0.012	0.146	-0.217	0.161	2.352	0.104	-0.222	0.104	-0.092	0.104
Kynurenine	-0.038	0.107	-0.304	0.107	-0.636	0.118	0.638	0.256	-0.461	0.256	-0.241	0.256
Lactic acid	0.019	0.163	0.034	0.163	-0.53	0.18	-0.264	0.132	-0.14	0.132	0.018	0.132
Lactose	-0.656	0.561	-0.666	0.561	0.383	0.618	0.475	0.671	0.273	0.671	1.169	0.671
Leucine	0.361	0.222	-0.003	0.222	-0.544	0.245	0.176	0.377	0.225	0.377	0.199	0.377
Leucylproline	1.417	0.53	1.349	0.53	1.352	0.584	0.638	0.484	0.696	0.484	-0.32	0.484
Linoleic acid	-0.213	0.149	-0.198	0.149	-0.806	0.164	0.225	0.29	-0.412	0.29	0.137	0.29
Lysine	0.231	0.133	0.222	0.133	-0.172	0.147	0.755	0.32	0.025	0.32	0.096	0.32
Malic acid	1.368	0.161	0.229	0.161	-1.72	0.177	2.803	0.22	-0.385	0.22	-0.181	0.22
Malonic acid	0.342	0.329	0.432	0.329	-0.185	0.362	-0.123	0.18	-0.411	0.18	-0.412	0.18
Maltose/Trehalose	-0.07	0.158	0.226	0.158	-0.461	0.174	-0.231	0.315	0.565	0.315	0.649	0.315
Methionine	0.012	0.134	-0.232	0.134	-0.656	0.148	0.659	0.309	0.658	0.309	0.5	0.309
Met-SO	0.069	0.399	0.126	0.399	0.586	0.439	NA	NA	NA	NA	NA	NA
Myristoleic acid	-0.174	0.157	-0.28	0.157	-0.43	0.173	-0.154	0.18	-0.545	0.18	-0.294	0.18
N1-methyladenosine	0.128	0.683	-0.122	0.683	-0.807	0.751	1.223	0.544	1.945	0.544	1.702	0.544
NAAG	-0.448	0.155	-0.067	0.155	-1.607	0.171	-0.185	0.091	-0.252	0.091	0.036	0.091
NAcGlutamic acid	0.574	0.17	-0.001	0.17	-1.11	0.187	0.372	0.103	-0.296	0.103	0.028	0.103
NAcGlutamine	0.272	0.263	-0.069	0.263	-0.806	0.289	NA	NA	NA	NA	NA	NA
NAcPutrescine	-0.287	0.175	0.18	0.175	0.123	0.193	-0.339	0.369	-0.547	0.369	-0.41	0.369
NAcSpermidine	-0.572	0.229	-0.115	0.229	-2.62	0.252	0.061	0.249	-0.349	0.249	-0.349	0.249
NAD	-0.581	0.278	-1.271	0.278	-2.599	0.306	0.312	0.155	-1.041	0.155	0.138	0.155
NADH	-0.227	0.368	-0.311	0.368	-2.774	0.405	-0.469	0.149	-0.716	0.149	-0.547	0.149
NADP	-0.355	0.407	-0.627	0.407	-1.86	0.448	0.149	0.211	0.589	0.211	0.363	0.211
NADPH	-0.104	0.292	-0.751	0.292	-1.691	0.322	-0.402	0.168	-0.982	0.168	-0.696	0.168
Niacinamide	-0.281	0.143	-0.244	0.143	-0.75	0.158	0.343	0.137	-0.318	0.137	-0.025	0.137
Nicotinic acid	-0.082	0.186	-0.103	0.186	-0.782	0.205	0.176	0.187	0.29	0.187	0.036	0.187
Nonanoic acid	-0.282	0.096	-0.104	0.096	-0.498	0.105	0.073	0.147	0.018	0.147	0.122	0.147
Oleic acid	-0.014	0.105	0.036	0.105	-0.269	0.116	0.143	0.261	-0.268	0.261	0.417	0.261
PEthanolamine	-0.329	0.258	1.079	0.258	-0.044	0.284	0.307	0.309	0.94	0.309	1.238	0.309
Ornithine	0.054	0.13	0.156	0.13	-0.332	0.143	0.382	0.271	-0.154	0.271	-0.087	0.271
Ox. glutathione	-0.925	0.161	0.089	0.161	-1.381	0.177	-1.102	0.26	0.565	0.26	0.006	0.26
Palmitoleic acid	-0.223	0.217	-0.408	0.217	-0.877	0.239	-0.016	0.27	-0.689	0.27	-0.059	0.27
Pantothenic acid	-2.029	0.191	0.094	0.191	-1.752	0.211	-2.808	0.291	0.286	0.291	-0.038	0.291
PCae(14:0)	0.144	0.201	0.203	0.201	-0.105	0.222	NA	NA	NA	NA	NA	NA
PCae(15:0)	-0.221	0.154	0.025	0.154	-0.349	0.169	0.454	0.202	0.849	0.202	0.683	0.202
PCae(16:0)	-0.253	0.205	0.105	0.205	0.001	0.225	1.235	0.345	1.547	0.345	1.075	0.345
PCae(16:1)	-0.152	0.194	0.119	0.194	0.013	0.213	0.928	0.273	1.237	0.273	0.899	0.273
PCae(17:0)	-0.202	0.17	0.148	0.17	0.075	0.187	NA	NA	NA	NA	NA	NA
PCae(18:0)	-0.23	0.212	0.278	0.212	0.21	0.234	0.435	0.192	0.577	0.192	0.462	0.192
PCae(18:1)	-0.242	0.204	0.088	0.204	-0.131	0.224	1.072	0.329	1.227	0.329	0.889	0.329
PCae(20:3)	1.361	0.784	0.77	0.784	0.661	0.863	NA	NA	NA	NA	NA	NA
PCae(20:4)	0.415	0.407	0.424	0.407	0.275	0.448	0.89	0.244	1.295	0.244	0.845	0.244
PCae(22:6)	0.01	0.213	0.125	0.213	0.14	0.234	1.88	0.418	2.116	0.418	1.479	0.418
Pentadecenoic acid	-0.241	0.202	-0.415	0.202	-0.615	0.223	-0.19	0.2	-1.012	0.2	-0.418	0.2
Phenylacetylglycine	-0.269	0.172	-0.282	0.172	-0.502	0.189	0.146	0.257	-0.211	0.257	-0.099	0.257
Phenylalanine	0.021	0.14	-0.168	0.14	-0.562	0.154	0.417	0.305	0.376	0.305	0.26	0.305
Phenylbutyric acid	-0.395	0.299	-0.344	0.299	-2.128	0.329	1.374	0.42	0.076	0.42	0.462	0.42
Phosphocreatine	-0.34	0.203	-0.333	0.203	-2.285	0.224	-0.294	0.122	-0.146	0.122	-0.019	0.122
Phosphoric acid	-0.29	0.121	-0.12	0.121	-1.261	0.133	0.309	0.197	0.273	0.197	0.173	0.197
Proline	0.981	0.394	1.508	0.394	-0.077	0.434	1.102	0.355	0.578	0.355	0.857	0.355
Putrescine	0.407	0.311	0.394	0.311	0.562	0.342	-1.07	0.67	-1.83	0.67	-1.002	0.67
Pyridoxine	0.014	0.079	-0.115	0.079	-0.331	0.087	0.119	0.245	-0.507	0.245	-0.391	0.245
Pyr/Oaa	0.053	0.115	0.034	0.115	-0.33	0.126	-0.594	0.259	-1.257	0.259	-0.785	0.259
Quinolinic acid	-0.592	0.19	-0.192	0.19	-1.756	0.21	-0.889	0.137	-0.783	0.137	-0.145	0.137
Ribitol	-0.869	0.144	-0.269	0.144	-1.407	0.158	-0.15	0.273	0.122	0.273	0.22	0.273
Riboflavin	0.12	0.097	0.052	0.097	-0.138	0.107	0.364	0.41	-0.404	0.41	0.261	0.41
Ribose-5P	-0.466	0.175	-0.245	0.175	-1.682	0.193	0.004	0.174	-0.27	0.174	-0.028	0.174
Ribose/Ribulose	-0.229	0.1	-0.03	0.1	-0.479	0.11	-0.072	0.189	1.021	0.189	0.307	0.189
Ribulose-5P	-0.84	0.287	-0.335	0.287	-1.388	0.316	-0.231	0.289	0.554	0.289	0.807	0.289
SAH	-1.445	0.287	-0.532	0.287	-2.267	0.316	-1.25	0.24	-2.231	0.24	-0.09	0.24
SAM	-0.577	0.311	-0.507	0.311	-2.111	0.343	0.92	0.134	0.391	0.134	0.391	0.134
Sarcosine	-0.15	0.122	-0.085	0.122	-0.916	0.134	0.267	0.112	0.308	0.112	0.371	0.112
Sebacic acid	-0.024	0.12	-0.028	0.12	-0.429	0.132	0.329	0.177	-0.147	0.177	-0.045	0.177
Serine	0.172	0.14	0.077	0.14	-0.569	0.154	0.566	0.426	0.709	0.426	-0.127	0.426
Shikimic acid	0.139	0.156	-0.152	0.156	-0.994	0.171	0.65	0.238	0.531	0.238	0.364	0.238
LactoylGSH	-2.045	0.573	-2.288	0.573	-4.728	0.631	-0.175	0.221	0.221	0.221	0.169	0.221
Spermidine	0.263	0.158	0.116	0.158	-0.648	0.174	-0.419	0.439	-1.138	0.439	-0.864	0.439
Spermine	0.389	0.156	0.039	0.156	-0.364	0.172	-0.421	0.439	-0.58	0.439	-0.699	0.439
Sphingosine	-0.418	0.286	0.621	0.286	-0.088	0.314	0.605	0.241	2.163	0.241	0.673	0.241
Succinic acid	0.011	0.136	0.319	0.136	0.311	0.149	1.447	0.143	1.364	0.143	0.747	0.143
Sucrose	0.268	0.407	0.037	0.407	0.705	0.448	-0.395	0.87	0.052	0.87	-1.346	0.87
Taurine	-0.406	0.211	-0.336	0.211	-2.742	0.232	0.669	0.305	-0.24	0.305	0.203	0.305
Taurocholic acid	-0.248	0.146	-0.131	0.146	-1.384	0.161	0.375	0.153	0.227	0.153	0.2	0.153
Threonic acid	-0.342	0.157	-0.155	0.157	-0.924	0.173	-0.26	0.166	0.075	0.166	0.152	0.166
Threonine	-0.01	0.127	-0.227	0.127	-0.657	0.14	0.699	0.279	0.82	0.279	0.515	0.279
Thymidine	-2.815	0.27	-0.032	0.27	-2.544	0.297	NA	NA	NA	NA	NA	NA
Tryptophan	-0.114	0.123	-0.22	0.123	-0.722	0.136	0.5	0.287	0.413	0.287	0.309	0.287
Tyrosine	-0.14	0.121	-0.234	0.121	-0.68	0.133	0.51	0.253	0.555	0.253	0.383	0.253
UMP	-1.942	0.595	-0.867	0.595	-3.317	0.655	-1.446	0.243	-0.252	0.243	-0.063	0.243
Uracil	-0.107	0.133	0.029	0.133	-0.452	0.146	0.211	0.145	0.153	0.145	0.231	0.145
Urea	-0.118	1.066	-0.048	1.066	-0.753	1.174	-0.107	0.36	-0.413	0.36	-0.644	0.36
Ureidosuccinic acid	0.218	0.149	-0.014	0.149	0.068	0.164	-1.347	0.265	-2.767	0.265	0.154	0.265
Uric acid	0.141	0.105	-0.097	0.105	-0.229	0.116	NA	NA	NA	NA	NA	NA
Valine	0.193	0.189	-0.06	0.189	-0.532	0.208	0.467	0.355	0.398	0.355	0.409	0.355
Xanthine	-0.089	0.108	-0.056	0.108	-0.31	0.119	NA	NA	NA	NA	NA	NA
Xylose	0.388	0.137	0.679	0.137	0.065	0.151	0.357	0.249	-0.022	0.249	-0.565	0.249
